# Supplementary material for: A Computational Model Predicting Disruption of Blood Vessel Development
Source: PLoS Comput Biol. 2013 Apr 4;9(4):e1002996. doi: 10.1371/journal.pcbi.1002996 (PMC3616981; doi:10.1371/journal.pcbi.1002996)
Supplement: Dataset S1 — Quantitative metrics of angiogenesis from AngioTool analysis of the output of the control model, n = 30 simulations. (XLSX) [file pcbi.1002996.s001.xlsx]

## Sheet: Sheet1
AngioTool v 0.5a (May 25, 2011)
Analysis of control model simulation outputs (N=30)
Sample	Date	Time	Image Location	Low Threshold	High Threshold	Vessel Thickness	Small Particles	Fill Holes	Scaling factor		Explant area	Vessels area	Vessels percentage area	Total Number of Junctions	Junctions density	Total Vessels Length	Average Vessels Length	Total Number of End Points	Average Lacunarity	Connectivity	Segments
Control_1	Oct 29, 2012	10:17:31 AM	C:\Program Files\AngioTool\images\control\Control_30.png	15	255	2	0	0	0.003		1.36008	0.769356	56.5668	42	30.8804	11.7133	2.92833	28	0.0855716	0.25	4
Control_2	Oct 29, 2012	10:21:35 AM	C:\Program Files\AngioTool\images\control\Control_45.png	15	255	2	0	0	0.003		1.34633	0.770688	57.2435	41	30.4531	11.8082	11.8082	23	0.0850701	1	1
Control_3	Oct 29, 2012	10:13:03 AM	C:\Program Files\AngioTool\images\control\Control_24.png	15	255	2	0	0	0.003		1.42607	0.791676	55.5146	36	25.2442	11.8234	11.8234	23	0.0892374	1	1
Control_4	Oct 29, 2012	10:22:09 AM	C:\Program Files\AngioTool\images\control\Control_47.png	15	255	2	0	0	0.003		1.37339	0.758007	55.1925	42	30.5813	11.8239	2.95598	26	0.0961315	0.25	4
Control_5	Oct 29, 2012	10:19:33 AM	C:\Program Files\AngioTool\images\control\Control_37.png	15	255	2	0	0	0.003		1.35399	0.791001	58.4201	51	37.6665	11.871	3.95699	19	0.0818735	0.333333	3
Control_6	Oct 29, 2012	10:14:28 AM	C:\Program Files\AngioTool\images\control\Control_28.png	15	255	2	0	0	0.003		1.41772	0.775206	54.6799	42	29.6251	11.9014	2.97535	28	0.0899982	0.25	4
Control_7	Oct 29, 2012	10:15:08 AM	C:\Program Files\AngioTool\images\control\Control_29.png	15	255	2	0	0	0.003		1.39533	0.778482	55.792	40	28.6671	11.9434	2.98584	24	0.089113	0.25	4
Control_8	Oct 29, 2012	10:19:50 AM	C:\Program Files\AngioTool\images\control\Control_38.png	15	255	2	0	0	0.003		1.30937	0.785088	59.959	51	38.9499	12.1087	6.05434	15	0.0815159	0.5	2
Control_9	Oct 29, 2012	10:21:04 AM	C:\Program Files\AngioTool\images\control\Control_43.png	15	255	2	0	0	0.003		1.40867	0.78003	55.3735	45	31.945	12.2503	3.06257	28	0.100529	0.25	4
Control_10	Oct 29, 2012	10:20:41 AM	C:\Program Files\AngioTool\images\control\Control_41.png	15	255	2	0	0	0.003		1.34434	0.798471	59.3949	52	38.6806	12.3772	2.47544	24	0.0800848	0.2	5
Control_11	Oct 29, 2012	10:23:49 AM	C:\Program Files\AngioTool\images\control\Control_53.png	15	255	2	0	0	0.003		1.42074	0.810612	57.0556	48	33.7852	12.4066	6.20328	20	0.100476	0.5	2
Control_12	Oct 29, 2012	10:24:18 AM	C:\Program Files\AngioTool\images\control\Control_55.png	15	255	2	0	0	0.003		1.35055	0.796509	58.9765	55	40.724	12.4489	12.4489	15	0.0749872	1	1
Control_13	Oct 29, 2012	10:23:01 AM	C:\Program Files\AngioTool\images\control\Control_50.png	15	255	2	0	0	0.003		1.34431	0.743679	55.3206	50	37.1939	12.4555	2.49109	26	0.0980001	0.2	5
Control_14	Oct 29, 2012	10:18:44 AM	C:\Program Files\AngioTool\images\control\Control_34.png	15	255	2	0	0	0.003		1.31768	0.761814	57.8149	47	35.6688	12.5697	6.28483	17	0.0920257	0.5	2
Control_15	Oct 29, 2012	10:11:31 AM	C:\Program Files\AngioTool\images\control\Control_22.png	15	255	2	0	0	0.003		1.39255	0.767403	55.1079	50	35.9054	12.6981	2.11635	27	0.0932378	0.166667	6
Control_16	Oct 29, 2012	10:23:34 AM	C:\Program Files\AngioTool\images\control\Control_51.png	15	255	2	0	0	0.003		1.34797	0.762795	56.5882	50	37.0927	12.7328	12.7328	18	0.0859566	1	1
Control_17	Oct 29, 2012	10:13:26 AM	C:\Program Files\AngioTool\images\control\Control_25.png	15	255	2	0	0	0.003		1.45185	0.833364	57.4002	50	34.4389	12.8316	4.2772	25	0.107333	0.333333	3
Control_18	Oct 29, 2012	10:13:45 AM	C:\Program Files\AngioTool\images\control\Control_26.png	15	255	2	0	0	0.003		1.40177	0.82152	58.606	53	37.8094	12.9142	2.58283	28	0.0985871	0.2	5
Control_19	Oct 29, 2012	10:30:18 AM	C:\Program Files\AngioTool\images\control\Control_6.png	15	255	2	0	0	0.003		1.42935	0.822276	57.5278	45	31.4828	12.9188	4.30626	13	0.0893908	0.333333	3
Control_20	Oct 29, 2012	10:14:05 AM	C:\Program Files\AngioTool\images\control\Control_27.png	15	255	2	0	0	0.003		1.40801	0.797472	56.6383	52	36.9316	13.0217	6.51087	22	0.0879019	0.5	2
Control_21	Oct 29, 2012	10:21:55 AM	C:\Program Files\AngioTool\images\control\Control_46.png	15	255	2	0	0	0.003		1.36029	0.79002	58.0773	54	39.6974	13.0661	6.53306	17	0.0960884	0.5	2
Control_22	Oct 29, 2012	10:31:10 AM	C:\Program Files\AngioTool\images\control\Control_9.png	15	255	2	0	0	0.003		1.37721	0.797166	57.8828	58	42.1142	13.2078	3.30194	24	0.082655	0.25	4
Control_23	Oct 29, 2012	10:23:16 AM	C:\Program Files\AngioTool\images\control\Control_52.png	15	255	2	0	0	0.003		1.35091	0.81558	60.3725	57	42.1937	13.2302	13.2302	11	0.0825128	1	1
Control_24	Oct 29, 2012	10:20:23 AM	C:\Program Files\AngioTool\images\control\Control_40.png	15	255	2	0	0	0.003		1.35185	0.804591	59.5178	62	45.8631	13.3445	6.67223	20	0.0723725	0.5	2
Control_25	Oct 29, 2012	10:11:06 AM	C:\Program Files\AngioTool\images\control\Control_21.png	15	255	2	0	0	0.003		1.50235	0.847647	56.4215	51	33.9469	13.4087	6.70437	27	0.0934976	0.5	2
Control_26	Oct 29, 2012	10:30:50 AM	C:\Program Files\AngioTool\images\control\Control_8.png	15	255	2	0	0	0.003		1.38212	0.856719	61.986	63	45.5823	13.4554	13.4554	14	0.069224	1	1
Control_27	Oct 29, 2012	10:18:24 AM	C:\Program Files\AngioTool\images\control\Control_33.png	15	255	2	0	0	0.003		1.38706	0.804582	58.0064	55	39.6523	13.4877	3.37192	25	0.0885479	0.25	4
Control_28	Oct 29, 2012	10:30:37 AM	C:\Program Files\AngioTool\images\control\Control_7.png	15	255	2	0	0	0.003		1.36817	0.823275	60.1734	68	49.7014	14.08	7.04	14	0.0697403	0.5	2
Control_29	Oct 29, 2012	10:24:03 AM	C:\Program Files\AngioTool\images\control\Control_54.png	15	255	2	0	0	0.003		1.49886	0.843507	56.2766	60	40.0304	14.2525	7.12627	28	0.0957919	0.5	2
Control_30	Oct 29, 2012	10:32:22 AM	C:\Program Files\AngioTool\images\control\Control_11.png	15	255	2	0	0	0.003		1.50298	0.87849	58.4498	71	47.2394	14.9366	7.46832	21	0.0773966	0.5	2
										Mean	1.3894	0.799234	57.5446	51.3667	36.9916	12.7696	6.19615	21.6667	0.0878282	0.483889	2.8
										Std Dev	0.0507318	0.0317051	1.81629	8.20632	5.82906	0.793374	3.66083	5.261	0.0094763	0.287328	1.44795
										CV	0.0365136	0.0396694	0.0315632	0.15976	0.157578	0.0621299	0.590823	0.242816	0.107896	0.593788	0.517124
