# Supplementary material for: A Computational Model Predicting Disruption of Blood Vessel Development
Source: PLoS Comput Biol. 2013 Apr 4;9(4):e1002996. doi: 10.1371/journal.pcbi.1002996 (PMC3616981; doi:10.1371/journal.pcbi.1002996)
Supplement: Dataset S4 — Comparison of AngioTool metrics (mean, std. dev.) between the control model, 5HPP-33 low concentration, and 5HPP-33 high concentration. (XLSX) [file pcbi.1002996.s004.xlsx]

## Sheet: Sheet1
AngioTool v 0.5a (May 25, 2011)
Analysis of Experimental Images donated by Noguchi lab
Sample	Date	Time	Image Location	Low Threshold	High Threshold	Vessel Thickness	Small Particles	Fill Holes	Scaling factor		Explant area	Vessels area	Vessels percentage area	Total Number of Junctions	Junctions density	Total Vessels Length	Average Vessels Length	Total Number of End Points	Average Lacunarity
5HPP-33DATA_3uM.png	Oct 29, 2012	3:59:31 PM	C:\Program Files\AngioTool\images\5HPP-33DATA_3uM_2.png	13	255	5	78	60	0.003		5.48317	1.64837	30.0623	163	29.7273	41.2963	0.305898	386	0.171633
5HPP-33DATA_30uM.png	Oct 29, 2012	4:07:37 PM	C:\Program Files\AngioTool\images\5HPP-33DATA_30uM_2.png	6	255	5	78	121	0.003		5.45683	1.10732	20.2923	45	8.24655	25.5786	0.0817209	650	0.269269
Noguchi_control.png	Oct 29, 2012	4:17:03 PM	C:\Program Files\AngioTool\images\Noguchi_control.png	6	255	5	78	61	0.003		3.87863	1.26166	32.5284	128	33.0014	33.0197	0.246416	352	0.157094
