# Supplementary material for: A Computational Model Predicting Disruption of Blood Vessel Development
Source: PLoS Comput Biol. 2013 Apr 4;9(4):e1002996. doi: 10.1371/journal.pcbi.1002996 (PMC3616981; doi:10.1371/journal.pcbi.1002996)
Supplement: Table S2 — Concentration response data for 5HPP-33, tested in 274 ToxCast assays across the Attagene, Novascreen, and Bioseek platforms. (XLSX) [file pcbi.1002996.s007.xlsx]

## Sheet: Sheet1
chemical_id	chemical_name	Platform	assay_name	conc1	conc2	conc3	conc4	conc5	conc6	conc7	conc8	resp1	resp2	resp3	resp4	resp5	resp6	resp7	resp8
DSSTox_GSID_46970	5HPP-33	Attagene	Ahr_CIS	0.091	0.274	0.823	2.469	7.407	22.22	66.67	200	0.964539	0.976697	0.948529	1.00735	1.05798	1.00079	2.27011	1.09157
DSSTox_GSID_46970	5HPP-33	Attagene	AP_1_CIS	0.091	0.274	0.823	2.469	7.407	22.22	66.67	200	1.00633	0.866565	0.986276	0.984446	1.20416	1.43775	1.69865	0.709615
DSSTox_GSID_46970	5HPP-33	Attagene	AP_2_CIS	0.091	0.274	0.823	2.469	7.407	22.22	66.67	200	1.04115	1.00402	1.00028	1.04649	1.01256	0.908284	0.964586	0.89799
DSSTox_GSID_46970	5HPP-33	Attagene	AR_TRANS	0.091	0.274	0.823	2.469	7.407	22.22	66.67	200	1.05995	0.893665	1.12964	1.01689	1.01598	1.2869	1.00716	1.13925
DSSTox_GSID_46970	5HPP-33	Attagene	BRE_CIS	0.091	0.274	0.823	2.469	7.407	22.22	66.67	200	0.993103	0.877743	1.14135	0.966975	0.938378	0.934054	3.3565	1.04902
DSSTox_GSID_46970	5HPP-33	Attagene	C_EBP_CIS	0.091	0.274	0.823	2.469	7.407	22.22	66.67	200	1.018	0.969093	1.04088	1.03554	1.12498	0.944788	1.31292	1.32163
DSSTox_GSID_46970	5HPP-33	Attagene	CAR_TRANS	0.091	0.274	0.823	2.469	7.407	22.22	66.67	200	1.09628	0.946432	0.997252	0.984981	0.813966	0.835283	0.840464	0.343104
DSSTox_GSID_46970	5HPP-33	Attagene	CMV_CIS	0.091	0.274	0.823	2.469	7.407	22.22	66.67	200	0.995683	0.939568	1.0007	0.919637	1.01999	1.41424	1.72655	1.10897
DSSTox_GSID_46970	5HPP-33	Attagene	CRE_CIS	0.091	0.274	0.823	2.469	7.407	22.22	66.67	200	1.08079	1.02517	1.008	0.950857	1.11191	1.16559	2.02879	3.20655
DSSTox_GSID_46970	5HPP-33	Attagene	DR4_LXR_CIS	0.091	0.274	0.823	2.469	7.407	22.22	66.67	200	1.01968	0.906238	0.999648	1.01654	0.879908	0.461968	0.424443	0.478481
DSSTox_GSID_46970	5HPP-33	Attagene	DR5_CIS	0.091	0.274	0.823	2.469	7.407	22.22	66.67	200	0.959904	1.09396	1.10724	0.928811	1.97579	2.10896	1.7095	2.03803
DSSTox_GSID_46970	5HPP-33	Attagene	E_Box_CIS	0.091	0.274	0.823	2.469	7.407	22.22	66.67	200	1.04134	0.955031	1.01988	0.967426	1.10929	0.944947	1.05674	0.894883
DSSTox_GSID_46970	5HPP-33	Attagene	E2F_CIS	0.091	0.274	0.823	2.469	7.407	22.22	66.67	200	1.02095	0.921905	0.954198	1.03817	0.971351	0.967713	0.944551	1.22949
DSSTox_GSID_46970	5HPP-33	Attagene	EGR_CIS	0.091	0.274	0.823	2.469	7.407	22.22	66.67	200	1.04775	0.97878	0.949631	0.926532	1.09944	1.20223	1.63942	2.7012
DSSTox_GSID_46970	5HPP-33	Attagene	ERa_TRANS	0.091	0.274	0.823	2.469	7.407	22.22	66.67	200	1.72309	2.62069	4.32309	5.19304	4.47546	4.96793	2.95801	1.06112
DSSTox_GSID_46970	5HPP-33	Attagene	ERE_CIS	0.091	0.274	0.823	2.469	7.407	22.22	66.67	200	1.54541	2.27275	1.00711	0.967358	4.09258	3.26576	4.08418	0.978048
DSSTox_GSID_46970	5HPP-33	Attagene	ERRa_TRANS	0.091	0.274	0.823	2.469	7.407	22.22	66.67	200	1.20702	0.853163	1.02152	1.38552	1.36884	0.823014	0.835567	0.338695
DSSTox_GSID_46970	5HPP-33	Attagene	ERRg_TRANS	0.091	0.274	0.823	2.469	7.407	22.22	66.67	200	1.02492	1.11433	1.13866	1.02359	0.940634	1.06588	0.845462	0.391139
DSSTox_GSID_46970	5HPP-33	Attagene	Ets_CIS	0.091	0.274	0.823	2.469	7.407	22.22	66.67	200	1.0202	0.952966	1.00952	1.02133	1.00229	0.917131	1.0075	0.896763
DSSTox_GSID_46970	5HPP-33	Attagene	FoxA2_CIS	0.091	0.274	0.823	2.469	7.407	22.22	66.67	200	1.0164	0.958849	1.03664	0.93893	1.047	0.97785	1.27906	1.32427
DSSTox_GSID_46970	5HPP-33	Attagene	FoxO_CIS	0.091	0.274	0.823	2.469	7.407	22.22	66.67	200	1.06682	1.02285	0.985421	0.990181	1.02519	0.938103	0.871888	1.07245
DSSTox_GSID_46970	5HPP-33	Attagene	FXR_TRANS	0.091	0.274	0.823	2.469	7.407	22.22	66.67	200	1.16958	1.15434	1.18939	1.16506	1.09079	1.46286	1.8229	1.91736
DSSTox_GSID_46970	5HPP-33	Attagene	GAL4_TRANS	0.091	0.274	0.823	2.469	7.407	22.22	66.67	200	1.03472	0.906944	0.951209	0.907531	0.841739	0.905121	0.610031	0.529783
DSSTox_GSID_46970	5HPP-33	Attagene	GATA_CIS	0.091	0.274	0.823	2.469	7.407	22.22	66.67	200	0.999527	0.993225	0.98338	1.05052	0.979827	0.901697	1.07412	0.842105
DSSTox_GSID_46970	5HPP-33	Attagene	GLI_CIS	0.091	0.274	0.823	2.469	7.407	22.22	66.67	200	1.03747	0.924574	1.00491	1.04024	0.914397	0.832685	1.18924	2.09533
DSSTox_GSID_46970	5HPP-33	Attagene	GR_TRANS	0.091	0.274	0.823	2.469	7.407	22.22	66.67	200	0.905933	1.07467	1.06099	1.17908	0.949555	1.13014	1.24331	1.37665
DSSTox_GSID_46970	5HPP-33	Attagene	GRE_CIS	0.091	0.274	0.823	2.469	7.407	22.22	66.67	200	0.96556	0.950532	1.06207	1.05186	0.99916	0.99647	1.01054	0.888285
DSSTox_GSID_46970	5HPP-33	Attagene	HIF1a_CIS	0.091	0.274	0.823	2.469	7.407	22.22	66.67	200	1.03762	1.07195	1.02723	1.02723	1.07076	1.22307	0.927495	1.08195
DSSTox_GSID_46970	5HPP-33	Attagene	HNF4a_TRANS	0.091	0.274	0.823	2.469	7.407	22.22	66.67	200	1.10056	1.42005	0.882969	1.10616	1.09678	1.06987	0.715109	0.473422
DSSTox_GSID_46970	5HPP-33	Attagene	HNF6_CIS	0.091	0.274	0.823	2.469	7.407	22.22	66.67	200	0.992121	0.941418	0.978154	0.980864	0.98231	0.951786	0.931826	0.692386
DSSTox_GSID_46970	5HPP-33	Attagene	HSE_CIS	0.091	0.274	0.823	2.469	7.407	22.22	66.67	200	0.990804	0.939151	1.04507	1.04507	0.98536	0.941636	1.81224	3.95372
DSSTox_GSID_46970	5HPP-33	Attagene	IR1_CIS	0.091	0.274	0.823	2.469	7.407	22.22	66.67	200	1.0665	0.953309	1.02155	1.01383	1.0803	0.864492	0.788312	0.644314
DSSTox_GSID_46970	5HPP-33	Attagene	ISRE_CIS	0.091	0.274	0.823	2.469	7.407	22.22	66.67	200	1.22625	0.874131	1.04362	0.962087	0.900478	0.883094	0.604569	0.361809
DSSTox_GSID_46970	5HPP-33	Attagene	LXRa_TRANS	0.091	0.274	0.823	2.469	7.407	22.22	66.67	200	0.857646	0.611301	1.00366	0.742006	0.814406	0.638001	0.978817	0.717799
DSSTox_GSID_46970	5HPP-33	Attagene	LXRb_TRANS	0.091	0.274	0.823	2.469	7.407	22.22	66.67	200	1.17081	1.09383	1.00433	1.15744	0.889932	0.836755	1.13027	1.10534
DSSTox_GSID_46970	5HPP-33	Attagene	M_06_CIS	0.091	0.274	0.823	2.469	7.407	22.22	66.67	200	0.997429	0.996495	1.00881	0.994716	1.01637	1.01922	0.979592	1.08854
DSSTox_GSID_46970	5HPP-33	Attagene	M_06_TRANS	0.091	0.274	0.823	2.469	7.407	22.22	66.67	200	0.964006	1.01312	0.995252	1.01425	1.00776	1.00118	0.995639	0.991868
DSSTox_GSID_46970	5HPP-33	Attagene	M_19_CIS	0.091	0.274	0.823	2.469	7.407	22.22	66.67	200	1.00683	1.00799	0.978046	1.01363	0.96121	0.953368	1.05182	0.775943
DSSTox_GSID_46970	5HPP-33	Attagene	M_19_TRANS	0.091	0.274	0.823	2.469	7.407	22.22	66.67	200	1.08032	0.969795	1.01202	0.967291	0.980527	0.996564	1.01024	1.0182
DSSTox_GSID_46970	5HPP-33	Attagene	M_32_CIS	0.091	0.274	0.823	2.469	7.407	22.22	66.67	200	1.01689	0.980874	1.00191	1.01907	0.971953	0.97774	1.12371	1.02451
DSSTox_GSID_46970	5HPP-33	Attagene	M_32_TRANS	0.091	0.274	0.823	2.469	7.407	22.22	66.67	200	1.02734	0.997407	1.07302	1.0906	1.07676	1.07676	0.964255	1.00165
DSSTox_GSID_46970	5HPP-33	Attagene	M_61_CIS	0.091	0.274	0.823	2.469	7.407	22.22	66.67	200	0.997429	0.996495	1.00881	0.994716	1.01637	1.01922	0.979592	1.08854
DSSTox_GSID_46970	5HPP-33	Attagene	M_61_TRANS	0.091	0.274	0.823	2.469	7.407	22.22	66.67	200	0.964006	1.01312	0.995252	1.01425	1.00776	1.00118	0.995639	0.991868
DSSTox_GSID_46970	5HPP-33	Attagene	MRE_CIS	0.091	0.274	0.823	2.469	7.407	22.22	66.67	200	1.04823	0.982712	1.00022	0.923693	1.2211	1.20016	1.79942	3.71716
DSSTox_GSID_46970	5HPP-33	Attagene	Myb_CIS	0.091	0.274	0.823	2.469	7.407	22.22	66.67	200	0.995195	0.979613	1.02355	0.982732	0.998022	0.979032	1.03367	1.12608
DSSTox_GSID_46970	5HPP-33	Attagene	Myc_CIS	0.091	0.274	0.823	2.469	7.407	22.22	66.67	200	1.0126	1.03464	0.990253	0.98159	1.09307	1.03727	1.0459	2.33127
DSSTox_GSID_46970	5HPP-33	Attagene	NF_kB_CIS	0.091	0.274	0.823	2.469	7.407	22.22	66.67	200	1.08019	0.960166	0.971234	0.979035	0.967557	1.08409	1.38578	1.05862
DSSTox_GSID_46970	5HPP-33	Attagene	NFI_CIS	0.091	0.274	0.823	2.469	7.407	22.22	66.67	200	1.01211	0.966353	1.04654	0.998276	1.02159	0.921172	1.40566	1.66443
DSSTox_GSID_46970	5HPP-33	Attagene	NRF1_CIS	0.091	0.274	0.823	2.469	7.407	22.22	66.67	200	1.00932	0.997391	1.04016	1.01153	0.978406	0.868336	1.01582	1.43741
DSSTox_GSID_46970	5HPP-33	Attagene	NRF2_ARE_CIS	0.091	0.274	0.823	2.469	7.407	22.22	66.67	200	1.19361	1.10361	0.995238	0.885714	1.15254	1.48184	2.46753	0.886414
DSSTox_GSID_46970	5HPP-33	Attagene	NURR1_TRANS	0.091	0.274	0.823	2.469	7.407	22.22	66.67	200	1.09283	1.25933	1.01392	1.04663	1.07889	0.97561	0.933705	1.19998
DSSTox_GSID_46970	5HPP-33	Attagene	Oct_MLP_CIS	0.091	0.274	0.823	2.469	7.407	22.22	66.67	200	1.08664	1.02814	1.02681	1.00992	1.08023	1.10359	1.76951	3.67687
DSSTox_GSID_46970	5HPP-33	Attagene	p53_CIS	0.091	0.274	0.823	2.469	7.407	22.22	66.67	200	1.05816	1.04503	1.02569	0.968926	0.995613	0.831217	1.18821	0.455563
DSSTox_GSID_46970	5HPP-33	Attagene	Pax6_CIS	0.091	0.274	0.823	2.469	7.407	22.22	66.67	200	1.00322	1.01243	1.02074	1.09648	0.964396	1.09907	1.48748	2.44378
DSSTox_GSID_46970	5HPP-33	Attagene	PBREM_CIS	0.091	0.274	0.823	2.469	7.407	22.22	66.67	200	1.04971	1.03824	0.915739	0.964797	1.23759	1.15065	1.18702	1.16306
DSSTox_GSID_46970	5HPP-33	Attagene	PPARa_TRANS	0.091	0.274	0.823	2.469	7.407	22.22	66.67	200	1.19378	1.12953	0.988192	0.988192	0.911516	0.774809	0.93616	0.812463
DSSTox_GSID_46970	5HPP-33	Attagene	PPARd_TRANS	0.091	0.274	0.823	2.469	7.407	22.22	66.67	200	1.04613	0.855764	0.900012	1.11051	0.953269	1.13976	1.27461	1.44759
DSSTox_GSID_46970	5HPP-33	Attagene	PPARg_TRANS	0.091	0.274	0.823	2.469	7.407	22.22	66.67	200	1.00647	1.0629	0.946304	0.880934	1.19134	1.53165	1.62039	1.46937
DSSTox_GSID_46970	5HPP-33	Attagene	PPRE_CIS	0.091	0.274	0.823	2.469	7.407	22.22	66.67	200	1.0188	0.90497	1.09397	0.944335	1.08329	1.20858	2.59143	1.67658
DSSTox_GSID_46970	5HPP-33	Attagene	PXR_TRANS	0.091	0.274	0.823	2.469	7.407	22.22	66.67	200	1.15452	2.07484	3.25193	4.38598	3.39157	3.71131	3.61448	1.32755
DSSTox_GSID_46970	5HPP-33	Attagene	PXRE_CIS	0.091	0.274	0.823	2.469	7.407	22.22	66.67	200	1.21582	1.55803	0.755433	0.737971	6.97607	6.26434	2.42162	0.397758
DSSTox_GSID_46970	5HPP-33	Attagene	RARa_TRANS	0.091	0.274	0.823	2.469	7.407	22.22	66.67	200	1.03515	0.78156	1.2113	1.19997	1.47932	2.40383	2.0722	0.50616
DSSTox_GSID_46970	5HPP-33	Attagene	RARb_TRANS	0.091	0.274	0.823	2.469	7.407	22.22	66.67	200	0.777865	0.835291	0.896848	0.860898	1.50518	1.952	1.29269	0.429265
DSSTox_GSID_46970	5HPP-33	Attagene	RARg_TRANS	0.091	0.274	0.823	2.469	7.407	22.22	66.67	200	1.15522	0.980762	1.08706	1.2083	1.54012	1.82584	1.82388	0.811597
DSSTox_GSID_46970	5HPP-33	Attagene	RORb_TRANS	0.091	0.274	0.823	2.469	7.407	22.22	66.67	200	0.758183	0.954927	0.810271	1.3151	0.965984	0.624695	0.433901	0.341766
DSSTox_GSID_46970	5HPP-33	Attagene	RORE_CIS	0.091	0.274	0.823	2.469	7.407	22.22	66.67	200	1.0363	1.0577	1.06329	0.973939	1.08149	1.14719	1.83732	1.71572
DSSTox_GSID_46970	5HPP-33	Attagene	RORg_TRANS	0.091	0.274	0.823	2.469	7.407	22.22	66.67	200	1.15014	1.17139	1.17166	1.34783	1.42514	0.891493	0.574907	0.332093
DSSTox_GSID_46970	5HPP-33	Attagene	RXRa_TRANS	0.091	0.274	0.823	2.469	7.407	22.22	66.67	200	0.986463	0.982525	1.10145	0.95703	1.08629	1.31313	1.31164	1.8363
DSSTox_GSID_46970	5HPP-33	Attagene	RXRb_TRANS	0.091	0.274	0.823	2.469	7.407	22.22	66.67	200	1.03547	1.11467	1.23762	1.01363	1.17031	1.19092	1.06967	0.915301
DSSTox_GSID_46970	5HPP-33	Attagene	Sox_CIS	0.091	0.274	0.823	2.469	7.407	22.22	66.67	200	0.965416	1.03135	1.03106	1.0357	0.983969	1.19279	1.19098	2.16648
DSSTox_GSID_46970	5HPP-33	Attagene	Sp1_CIS	0.091	0.274	0.823	2.469	7.407	22.22	66.67	200	1.04386	1.03728	1.02403	0.989468	1.10629	1.07592	1.39058	2.02009
DSSTox_GSID_46970	5HPP-33	Attagene	SREBP_CIS	0.091	0.274	0.823	2.469	7.407	22.22	66.67	200	1.03891	0.953505	1.01276	0.995747	1.04821	0.975699	1.16023	1.49044
DSSTox_GSID_46970	5HPP-33	Attagene	STAT3_CIS	0.091	0.274	0.823	2.469	7.407	22.22	66.67	200	1.05115	1.00247	0.995472	0.975186	0.976952	1.15242	1.0158	0.913458
DSSTox_GSID_46970	5HPP-33	Attagene	TA_CIS	0.091	0.274	0.823	2.469	7.407	22.22	66.67	200	1.05571	1.00198	1.03871	0.922581	0.983112	1.0751	1.38629	1.21765
DSSTox_GSID_46970	5HPP-33	Attagene	TAL_CIS	0.091	0.274	0.823	2.469	7.407	22.22	66.67	200	1.05806	0.980645	1.0068	0.979592	1.1148	1.09356	1.00264	1.27619
DSSTox_GSID_46970	5HPP-33	Attagene	TCF_b_cat_CIS	0.091	0.274	0.823	2.469	7.407	22.22	66.67	200	1.06253	0.943681	1.12726	1.06177	0.838981	0.670789	0.769819	0.204308
DSSTox_GSID_46970	5HPP-33	Attagene	TGFb_CIS	0.091	0.274	0.823	2.469	7.407	22.22	66.67	200	1.07842	0.915642	0.909585	0.90648	0.939428	1.03159	1.22844	0.915012
DSSTox_GSID_46970	5HPP-33	Attagene	THRa1_TRANS	0.091	0.274	0.823	2.469	7.407	22.22	66.67	200	1.06466	1.01226	1.07015	1.29557	0.829913	0.993076	1.35247	0.658453
DSSTox_GSID_46970	5HPP-33	Attagene	VDR_TRANS	0.091	0.274	0.823	2.469	7.407	22.22	66.67	200	1.07432	1.13405	1.10474	1.38735	1.06608	1.40863	1.20304	1.54114
DSSTox_GSID_46970	5HPP-33	Attagene	VDRE_CIS	0.091	0.274	0.823	2.469	7.407	22.22	66.67	200	1.07359	1.08658	0.969025	0.979098	1.61921	1.75815	2.17541	3.24555
DSSTox_GSID_46970	5HPP-33	Attagene	Xbp1_CIS	0.091	0.274	0.823	2.469	7.407	22.22	66.67	200	1.05912	0.979632	0.92963	0.937037	1.2111	1.12746	1.73984	4.47451
DSSTox_GSID_46970	5HPP-33	Attagene	XTT_Cytotoxicity	0.091	0.274	0.823	2.469	7.407	22.22	66.67	200	101.511	94.4336	111.608	106.061	125.263	110.688	114.09	106.688
DSSTox_GSID_46970	5HPP-33	Attagene	XTT_Cytotoxicity	0.091	0.274	0.823	2.469	7.407	22.22	66.67	200	93.6405	119.545	110.405	110.52	119.884	111.748	113.439	106.227
105624-86-0	5HPP-33	Bioseek	3C_Eselectin	1.48	4.44	13.3	40	NA	NA	NA	NA	1.00446	1.05502	0.97351	1.41004	NA	NA	NA	NA
105624-86-0	5HPP-33	Bioseek	3C_Eselectin	1.48	4.44	13.3	40	NA	NA	NA	NA	1.07627	1.05717	1.00584	1.36147	NA	NA	NA	NA
105624-86-0	5HPP-33	Bioseek	3C_hLADR	1.48	4.44	13.3	40	NA	NA	NA	NA	1.01304	1.51229	4.60135	7.28449	NA	NA	NA	NA
105624-86-0	5HPP-33	Bioseek	3C_hLADR	1.48	4.44	13.3	40	NA	NA	NA	NA	1.06714	1.57953	3.92905	7.44149	NA	NA	NA	NA
105624-86-0	5HPP-33	Bioseek	3C_ICAM1	1.48	4.44	13.3	40	NA	NA	NA	NA	1.03604	1.03865	1.03254	1.13968	NA	NA	NA	NA
105624-86-0	5HPP-33	Bioseek	3C_ICAM1	1.48	4.44	13.3	40	NA	NA	NA	NA	1.07164	1.06548	1.01413	1.01726	NA	NA	NA	NA
105624-86-0	5HPP-33	Bioseek	3C_IL8	1.48	4.44	13.3	40	NA	NA	NA	NA	1.00773	0.917098	0.768253	1.13722	NA	NA	NA	NA
105624-86-0	5HPP-33	Bioseek	3C_IL8	1.48	4.44	13.3	40	NA	NA	NA	NA	0.980222	0.932455	0.762814	1.12662	NA	NA	NA	NA
105624-86-0	5HPP-33	Bioseek	3C_MCP1	1.48	4.44	13.3	40	NA	NA	NA	NA	1.03046	0.981512	0.866981	0.905834	NA	NA	NA	NA
105624-86-0	5HPP-33	Bioseek	3C_MCP1	1.48	4.44	13.3	40	NA	NA	NA	NA	1.05141	0.990544	0.856712	0.931538	NA	NA	NA	NA
105624-86-0	5HPP-33	Bioseek	3C_MIG	1.48	4.44	13.3	40	NA	NA	NA	NA	1.00967	1.00624	0.991217	1.09798	NA	NA	NA	NA
105624-86-0	5HPP-33	Bioseek	3C_MIG	1.48	4.44	13.3	40	NA	NA	NA	NA	0.997936	1.01293	1.00882	1.07588	NA	NA	NA	NA
105624-86-0	5HPP-33	Bioseek	3C_Proliferation	1.48	4.44	13.3	40	NA	NA	NA	NA	1.3381	3.53109	6.29162	6.73886	NA	NA	NA	NA
105624-86-0	5HPP-33	Bioseek	3C_Proliferation	1.48	4.44	13.3	40	NA	NA	NA	NA	1.2339	3.59233	5.90005	7.32101	NA	NA	NA	NA
105624-86-0	5HPP-33	Bioseek	3C_SRB	1.48	4.44	13.3	40	NA	NA	NA	NA	0.99523	1.14133	1.4682	2.2036	NA	NA	NA	NA
105624-86-0	5HPP-33	Bioseek	3C_SRB	1.48	4.44	13.3	40	NA	NA	NA	NA	0.97043	1.12492	1.44235	1.98319	NA	NA	NA	NA
105624-86-0	5HPP-33	Bioseek	3C_Thrombomodulin	1.48	4.44	13.3	40	NA	NA	NA	NA	1.03548	0.991511	0.945737	1.02215	NA	NA	NA	NA
105624-86-0	5HPP-33	Bioseek	3C_Thrombomodulin	1.48	4.44	13.3	40	NA	NA	NA	NA	1.08022	1.00516	0.931313	0.946019	NA	NA	NA	NA
105624-86-0	5HPP-33	Bioseek	3C_TissueFactor	1.48	4.44	13.3	40	NA	NA	NA	NA	0.890378	0.92035	0.932719	1.57095	NA	NA	NA	NA
105624-86-0	5HPP-33	Bioseek	3C_TissueFactor	1.48	4.44	13.3	40	NA	NA	NA	NA	0.915061	0.891258	0.95241	1.28587	NA	NA	NA	NA
105624-86-0	5HPP-33	Bioseek	3C_uPAR	1.48	4.44	13.3	40	NA	NA	NA	NA	1.10932	1.11	1.50781	2.70672	NA	NA	NA	NA
105624-86-0	5HPP-33	Bioseek	3C_uPAR	1.48	4.44	13.3	40	NA	NA	NA	NA	1.15146	1.1847	1.36079	2.4928	NA	NA	NA	NA
105624-86-0	5HPP-33	Bioseek	3C_VCAM1	1.48	4.44	13.3	40	NA	NA	NA	NA	1.03045	1.16532	1.34865	2.07815	NA	NA	NA	NA
105624-86-0	5HPP-33	Bioseek	3C_VCAM1	1.48	4.44	13.3	40	NA	NA	NA	NA	1.0721	1.12776	1.30651	1.97611	NA	NA	NA	NA
105624-86-0	5HPP-33	Bioseek	3C_Vis	1.48	4.44	13.3	40	NA	NA	NA	NA	1.33333	1.33333	2	2	NA	NA	NA	NA
105624-86-0	5HPP-33	Bioseek	3C_Vis	1.48	4.44	13.3	40	NA	NA	NA	NA	1.33333	1.33333	2	2	NA	NA	NA	NA
105624-86-0	5HPP-33	Bioseek	4H_Eotaxin3	1.48	4.44	13.3	40	NA	NA	NA	NA	0.960627	0.859004	1.04143	4.69094	NA	NA	NA	NA
105624-86-0	5HPP-33	Bioseek	4H_Eotaxin3	1.48	4.44	13.3	40	NA	NA	NA	NA	0.951505	0.890565	0.996476	4.55252	NA	NA	NA	NA
105624-86-0	5HPP-33	Bioseek	4H_MCP1	1.48	4.44	13.3	40	NA	NA	NA	NA	1.02749	0.682241	0.629294	1.48117	NA	NA	NA	NA
105624-86-0	5HPP-33	Bioseek	4H_MCP1	1.48	4.44	13.3	40	NA	NA	NA	NA	0.991096	0.715003	0.615899	1.38076	NA	NA	NA	NA
105624-86-0	5HPP-33	Bioseek	4H_Pselectin	1.48	4.44	13.3	40	NA	NA	NA	NA	0.912013	1.02706	1.57066	1.73061	NA	NA	NA	NA
105624-86-0	5HPP-33	Bioseek	4H_Pselectin	1.48	4.44	13.3	40	NA	NA	NA	NA	1.0174	1.16176	1.54411	1.77582	NA	NA	NA	NA
105624-86-0	5HPP-33	Bioseek	4H_SRB	1.48	4.44	13.3	40	NA	NA	NA	NA	1.06021	1.10746	1.27264	1.47313	NA	NA	NA	NA
105624-86-0	5HPP-33	Bioseek	4H_SRB	1.48	4.44	13.3	40	NA	NA	NA	NA	1.04034	1.13001	1.22844	1.41577	NA	NA	NA	NA
105624-86-0	5HPP-33	Bioseek	4H_uPAR	1.48	4.44	13.3	40	NA	NA	NA	NA	1.23185	1.26923	1.35921	2.51868	NA	NA	NA	NA
105624-86-0	5HPP-33	Bioseek	4H_uPAR	1.48	4.44	13.3	40	NA	NA	NA	NA	1.16856	1.32313	1.36261	2.14558	NA	NA	NA	NA
105624-86-0	5HPP-33	Bioseek	4H_VCAM1	1.48	4.44	13.3	40	NA	NA	NA	NA	0.989026	0.946736	1.04336	2.24728	NA	NA	NA	NA
105624-86-0	5HPP-33	Bioseek	4H_VCAM1	1.48	4.44	13.3	40	NA	NA	NA	NA	0.964894	1.00971	1.0683	2.14783	NA	NA	NA	NA
105624-86-0	5HPP-33	Bioseek	4H_VEGFRII	1.48	4.44	13.3	40	NA	NA	NA	NA	1.09101	1.01811	1.14357	1.50218	NA	NA	NA	NA
105624-86-0	5HPP-33	Bioseek	4H_VEGFRII	1.48	4.44	13.3	40	NA	NA	NA	NA	1.05195	1.04749	1.25139	1.4042	NA	NA	NA	NA
105624-86-0	5HPP-33	Bioseek	BE3C_hLADR	1.48	4.44	13.3	40	NA	NA	NA	NA	0.959332	1.15602	1.74593	3.00966	NA	NA	NA	NA
105624-86-0	5HPP-33	Bioseek	BE3C_hLADR	1.48	4.44	13.3	40	NA	NA	NA	NA	1.01148	1.17761	1.68564	2.93408	NA	NA	NA	NA
105624-86-0	5HPP-33	Bioseek	BE3C_IL1a	1.48	4.44	13.3	40	NA	NA	NA	NA	1.15119	1.1371	1.20133	1.91272	NA	NA	NA	NA
105624-86-0	5HPP-33	Bioseek	BE3C_IL1a	1.48	4.44	13.3	40	NA	NA	NA	NA	0.967898	1.11633	1.18074	1.79664	NA	NA	NA	NA
105624-86-0	5HPP-33	Bioseek	BE3C_IP10	1.48	4.44	13.3	40	NA	NA	NA	NA	1.01262	1.15204	1.66658	3.30529	NA	NA	NA	NA
105624-86-0	5HPP-33	Bioseek	BE3C_IP10	1.48	4.44	13.3	40	NA	NA	NA	NA	1.18096	1.14807	1.62502	3.45714	NA	NA	NA	NA
105624-86-0	5HPP-33	Bioseek	BE3C_MIG	1.48	4.44	13.3	40	NA	NA	NA	NA	0.98096	0.985974	1.03775	1.491	NA	NA	NA	NA
105624-86-0	5HPP-33	Bioseek	BE3C_MIG	1.48	4.44	13.3	40	NA	NA	NA	NA	1.00352	1.01607	1.03522	1.22778	NA	NA	NA	NA
105624-86-0	5HPP-33	Bioseek	BE3C_MMP1	1.48	4.44	13.3	40	NA	NA	NA	NA	1.07922	1.0231	0.92108	0.856987	NA	NA	NA	NA
105624-86-0	5HPP-33	Bioseek	BE3C_MMP1	1.48	4.44	13.3	40	NA	NA	NA	NA	1.06625	0.999679	0.915709	0.851003	NA	NA	NA	NA
105624-86-0	5HPP-33	Bioseek	BE3C_PAI1	1.48	4.44	13.3	40	NA	NA	NA	NA	1.14244	1.22739	1.48116	1.82266	NA	NA	NA	NA
105624-86-0	5HPP-33	Bioseek	BE3C_PAI1	1.48	4.44	13.3	40	NA	NA	NA	NA	1.22158	1.24442	1.52382	2.00024	NA	NA	NA	NA
105624-86-0	5HPP-33	Bioseek	BE3C_SRB	1.48	4.44	13.3	40	NA	NA	NA	NA	0.989191	0.999389	1.02798	1.15873	NA	NA	NA	NA
105624-86-0	5HPP-33	Bioseek	BE3C_SRB	1.48	4.44	13.3	40	NA	NA	NA	NA	0.997428	0.987364	1.02651	1.15712	NA	NA	NA	NA
105624-86-0	5HPP-33	Bioseek	BE3C_TGFb1	1.48	4.44	13.3	40	NA	NA	NA	NA	0.990342	1.04611	1.11994	1.39382	NA	NA	NA	NA
105624-86-0	5HPP-33	Bioseek	BE3C_TGFb1	1.48	4.44	13.3	40	NA	NA	NA	NA	1.10228	1.13247	1.11484	1.24486	NA	NA	NA	NA
105624-86-0	5HPP-33	Bioseek	BE3C_tPA	1.48	4.44	13.3	40	NA	NA	NA	NA	1.00391	0.775479	1.14687	1.64263	NA	NA	NA	NA
105624-86-0	5HPP-33	Bioseek	BE3C_tPA	1.48	4.44	13.3	40	NA	NA	NA	NA	0.98678	0.835085	1.04676	1.5388	NA	NA	NA	NA
105624-86-0	5HPP-33	Bioseek	BE3C_uPA	1.48	4.44	13.3	40	NA	NA	NA	NA	1.05573	1.0138	1.02035	1.12013	NA	NA	NA	NA
105624-86-0	5HPP-33	Bioseek	BE3C_uPA	1.48	4.44	13.3	40	NA	NA	NA	NA	1.0829	1.0206	1.03421	1.17896	NA	NA	NA	NA
105624-86-0	5HPP-33	Bioseek	BE3C_uPAR	1.48	4.44	13.3	40	NA	NA	NA	NA	1.01158	1.05971	1.09061	1.27614	NA	NA	NA	NA
105624-86-0	5HPP-33	Bioseek	BE3C_uPAR	1.48	4.44	13.3	40	NA	NA	NA	NA	1.02941	1.06089	1.10792	1.24451	NA	NA	NA	NA
105624-86-0	5HPP-33	Bioseek	CASM3C_HLADR	1.48	4.44	13.3	40	NA	NA	NA	NA	0.88073	0.839963	1.4574	2.92623	NA	NA	NA	NA
105624-86-0	5HPP-33	Bioseek	CASM3C_HLADR	1.48	4.44	13.3	40	NA	NA	NA	NA	0.909862	0.754149	1.35817	2.2882	NA	NA	NA	NA
105624-86-0	5HPP-33	Bioseek	CASM3C_IL6	1.48	4.44	13.3	40	NA	NA	NA	NA	0.921544	0.929757	0.860361	0.745667	NA	NA	NA	NA
105624-86-0	5HPP-33	Bioseek	CASM3C_IL6	1.48	4.44	13.3	40	NA	NA	NA	NA	0.924402	0.939809	0.861782	0.758682	NA	NA	NA	NA
105624-86-0	5HPP-33	Bioseek	CASM3C_IL8	1.48	4.44	13.3	40	NA	NA	NA	NA	1.03436	1.06778	0.926784	0.854586	NA	NA	NA	NA
105624-86-0	5HPP-33	Bioseek	CASM3C_IL8	1.48	4.44	13.3	40	NA	NA	NA	NA	1.0063	1.07975	0.948911	0.890052	NA	NA	NA	NA
105624-86-0	5HPP-33	Bioseek	CASM3C_LDLR	1.48	4.44	13.3	40	NA	NA	NA	NA	1.11155	1.18693	0.996277	2.2336	NA	NA	NA	NA
105624-86-0	5HPP-33	Bioseek	CASM3C_LDLR	1.48	4.44	13.3	40	NA	NA	NA	NA	1.08819	1.18973	0.941797	2.18519	NA	NA	NA	NA
105624-86-0	5HPP-33	Bioseek	CASM3C_MCP1	1.48	4.44	13.3	40	NA	NA	NA	NA	1.10075	1.13879	0.993309	0.972006	NA	NA	NA	NA
105624-86-0	5HPP-33	Bioseek	CASM3C_MCP1	1.48	4.44	13.3	40	NA	NA	NA	NA	1.03646	1.13476	1.01641	0.974882	NA	NA	NA	NA
105624-86-0	5HPP-33	Bioseek	CASM3C_MCSF	1.48	4.44	13.3	40	NA	NA	NA	NA	1.03904	1.10594	1.00742	1.98986	NA	NA	NA	NA
105624-86-0	5HPP-33	Bioseek	CASM3C_MCSF	1.48	4.44	13.3	40	NA	NA	NA	NA	1.08552	1.16768	1.05741	2.03803	NA	NA	NA	NA
105624-86-0	5HPP-33	Bioseek	CASM3C_MIG	1.48	4.44	13.3	40	NA	NA	NA	NA	0.981952	0.945371	0.964302	1.01911	NA	NA	NA	NA
105624-86-0	5HPP-33	Bioseek	CASM3C_MIG	1.48	4.44	13.3	40	NA	NA	NA	NA	0.977866	0.958125	0.963596	1.04092	NA	NA	NA	NA
105624-86-0	5HPP-33	Bioseek	CASM3C_Proliferation	1.48	4.44	13.3	40	NA	NA	NA	NA	1.12574	1.61747	1.03602	2.64724	NA	NA	NA	NA
105624-86-0	5HPP-33	Bioseek	CASM3C_Proliferation	1.48	4.44	13.3	40	NA	NA	NA	NA	1.0919	1.54078	1.35931	2.87529	NA	NA	NA	NA
105624-86-0	5HPP-33	Bioseek	CASM3C_SAA	1.48	4.44	13.3	40	NA	NA	NA	NA	0.958333	1.1056	1.09029	1.78961	NA	NA	NA	NA
105624-86-0	5HPP-33	Bioseek	CASM3C_SAA	1.48	4.44	13.3	40	NA	NA	NA	NA	1.08528	1.13119	1.09704	1.64429	NA	NA	NA	NA
105624-86-0	5HPP-33	Bioseek	CASM3C_SRB	1.48	4.44	13.3	40	NA	NA	NA	NA	1.01505	1.09494	1.09141	1.44402	NA	NA	NA	NA
105624-86-0	5HPP-33	Bioseek	CASM3C_SRB	1.48	4.44	13.3	40	NA	NA	NA	NA	1.02838	1.11158	1.05842	1.37763	NA	NA	NA	NA
105624-86-0	5HPP-33	Bioseek	CASM3C_Thrombomodulin	1.48	4.44	13.3	40	NA	NA	NA	NA	1.01123	0.907243	0.978121	1.28564	NA	NA	NA	NA
105624-86-0	5HPP-33	Bioseek	CASM3C_Thrombomodulin	1.48	4.44	13.3	40	NA	NA	NA	NA	0.967666	0.976984	0.934324	1.17523	NA	NA	NA	NA
105624-86-0	5HPP-33	Bioseek	CASM3C_TissueFactor	1.48	4.44	13.3	40	NA	NA	NA	NA	1.00058	1.01913	1.05363	1.21234	NA	NA	NA	NA
105624-86-0	5HPP-33	Bioseek	CASM3C_TissueFactor	1.48	4.44	13.3	40	NA	NA	NA	NA	1.00097	1.02683	1.01673	1.23317	NA	NA	NA	NA
105624-86-0	5HPP-33	Bioseek	CASM3C_uPAR	1.48	4.44	13.3	40	NA	NA	NA	NA	1.07445	1.18036	1.32314	2.77538	NA	NA	NA	NA
105624-86-0	5HPP-33	Bioseek	CASM3C_uPAR	1.48	4.44	13.3	40	NA	NA	NA	NA	1.22082	1.23226	1.25313	2.41457	NA	NA	NA	NA
105624-86-0	5HPP-33	Bioseek	CASM3C_VCAM1	1.48	4.44	13.3	40	NA	NA	NA	NA	1.02795	1.07703	1.20843	1.53351	NA	NA	NA	NA
105624-86-0	5HPP-33	Bioseek	CASM3C_VCAM1	1.48	4.44	13.3	40	NA	NA	NA	NA	1.06857	1.07633	1.17593	1.56322	NA	NA	NA	NA
105624-86-0	5HPP-33	Bioseek	hDFCGF_CollagenIII	1.48	4.44	13.3	40	NA	NA	NA	NA	1.12049	1.20965	1.04945	1.58842	NA	NA	NA	NA
105624-86-0	5HPP-33	Bioseek	hDFCGF_CollagenIII	1.48	4.44	13.3	40	NA	NA	NA	NA	1.12601	1.17408	1.03265	1.39898	NA	NA	NA	NA
105624-86-0	5HPP-33	Bioseek	hDFCGF_EGFR	1.48	4.44	13.3	40	NA	NA	NA	NA	1.06169	1.04423	1.21265	1.2852	NA	NA	NA	NA
105624-86-0	5HPP-33	Bioseek	hDFCGF_EGFR	1.48	4.44	13.3	40	NA	NA	NA	NA	1.06208	1.00457	1.17717	1.29746	NA	NA	NA	NA
105624-86-0	5HPP-33	Bioseek	hDFCGF_IL8	1.48	4.44	13.3	40	NA	NA	NA	NA	1.01698	0.952244	0.882592	0.991215	NA	NA	NA	NA
105624-86-0	5HPP-33	Bioseek	hDFCGF_IL8	1.48	4.44	13.3	40	NA	NA	NA	NA	1.04256	0.976453	0.888902	0.981995	NA	NA	NA	NA
105624-86-0	5HPP-33	Bioseek	hDFCGF_IP10	1.48	4.44	13.3	40	NA	NA	NA	NA	1.02959	1.07037	1.29974	5.65353	NA	NA	NA	NA
105624-86-0	5HPP-33	Bioseek	hDFCGF_IP10	1.48	4.44	13.3	40	NA	NA	NA	NA	1.17212	1.07505	1.35168	5.29611	NA	NA	NA	NA
105624-86-0	5HPP-33	Bioseek	hDFCGF_MCSF	1.48	4.44	13.3	40	NA	NA	NA	NA	1.02306	1.01458	1.22628	2.12521	NA	NA	NA	NA
105624-86-0	5HPP-33	Bioseek	hDFCGF_MCSF	1.48	4.44	13.3	40	NA	NA	NA	NA	1.03761	0.944479	1.19292	1.90341	NA	NA	NA	NA
105624-86-0	5HPP-33	Bioseek	hDFCGF_MIG	1.48	4.44	13.3	40	NA	NA	NA	NA	1.02267	1.01146	1.00297	1.44516	NA	NA	NA	NA
105624-86-0	5HPP-33	Bioseek	hDFCGF_MIG	1.48	4.44	13.3	40	NA	NA	NA	NA	1.00598	1.00776	1.04106	1.40175	NA	NA	NA	NA
105624-86-0	5HPP-33	Bioseek	hDFCGF_MMP1	1.48	4.44	13.3	40	NA	NA	NA	NA	0.991484	0.932398	0.844189	1.17821	NA	NA	NA	NA
105624-86-0	5HPP-33	Bioseek	hDFCGF_MMP1	1.48	4.44	13.3	40	NA	NA	NA	NA	0.920142	0.933684	0.856386	0.998678	NA	NA	NA	NA
105624-86-0	5HPP-33	Bioseek	hDFCGF_PAI1	1.48	4.44	13.3	40	NA	NA	NA	NA	1.22227	1.11761	1.4065	3.67756	NA	NA	NA	NA
105624-86-0	5HPP-33	Bioseek	hDFCGF_PAI1	1.48	4.44	13.3	40	NA	NA	NA	NA	1.01845	1.03895	1.44982	3.38446	NA	NA	NA	NA
105624-86-0	5HPP-33	Bioseek	hDFCGF_Proliferation	1.48	4.44	13.3	40	NA	NA	NA	NA	1.12644	2.72617	4.58583	12.069	NA	NA	NA	NA
105624-86-0	5HPP-33	Bioseek	hDFCGF_Proliferation	1.48	4.44	13.3	40	NA	NA	NA	NA	1.30825	2.59742	4.60128	12.1226	NA	NA	NA	NA
105624-86-0	5HPP-33	Bioseek	hDFCGF_SRB	1.48	4.44	13.3	40	NA	NA	NA	NA	1.0274	0.966176	1.20381	2.21261	NA	NA	NA	NA
105624-86-0	5HPP-33	Bioseek	hDFCGF_SRB	1.48	4.44	13.3	40	NA	NA	NA	NA	0.979951	0.95264	1.17978	1.91451	NA	NA	NA	NA
105624-86-0	5HPP-33	Bioseek	hDFCGF_TIMP1	1.48	4.44	13.3	40	NA	NA	NA	NA	0.889958	0.785723	0.578518	0.76424	NA	NA	NA	NA
105624-86-0	5HPP-33	Bioseek	hDFCGF_TIMP1	1.48	4.44	13.3	40	NA	NA	NA	NA	0.804184	0.784987	0.637569	0.666584	NA	NA	NA	NA
105624-86-0	5HPP-33	Bioseek	hDFCGF_VCAM1	1.48	4.44	13.3	40	NA	NA	NA	NA	1.04428	1.27868	2.13804	4.61359	NA	NA	NA	NA
105624-86-0	5HPP-33	Bioseek	hDFCGF_VCAM1	1.48	4.44	13.3	40	NA	NA	NA	NA	1.31985	1.36765	1.92332	4.18295	NA	NA	NA	NA
105624-86-0	5HPP-33	Bioseek	KF3CT_ICAM1	1.48	4.44	13.3	40	NA	NA	NA	NA	1.06413	1.05166	0.918961	1.12575	NA	NA	NA	NA
105624-86-0	5HPP-33	Bioseek	KF3CT_ICAM1	1.48	4.44	13.3	40	NA	NA	NA	NA	0.934487	0.999484	0.92995	1.03864	NA	NA	NA	NA
105624-86-0	5HPP-33	Bioseek	KF3CT_IL1a	1.48	4.44	13.3	40	NA	NA	NA	NA	0.989365	0.960415	0.963196	2.20259	NA	NA	NA	NA
105624-86-0	5HPP-33	Bioseek	KF3CT_IL1a	1.48	4.44	13.3	40	NA	NA	NA	NA	0.948726	1.0243	1.01153	1.96258	NA	NA	NA	NA
105624-86-0	5HPP-33	Bioseek	KF3CT_IP10	1.48	4.44	13.3	40	NA	NA	NA	NA	0.995488	1.03366	1.37539	7.70893	NA	NA	NA	NA
105624-86-0	5HPP-33	Bioseek	KF3CT_IP10	1.48	4.44	13.3	40	NA	NA	NA	NA	0.991533	1.08315	1.39837	6.60766	NA	NA	NA	NA
105624-86-0	5HPP-33	Bioseek	KF3CT_MCP1	1.48	4.44	13.3	40	NA	NA	NA	NA	1.05398	0.896049	0.773407	1.40022	NA	NA	NA	NA
105624-86-0	5HPP-33	Bioseek	KF3CT_MCP1	1.48	4.44	13.3	40	NA	NA	NA	NA	0.996637	0.956772	0.777311	0.885581	NA	NA	NA	NA
105624-86-0	5HPP-33	Bioseek	KF3CT_MMP9	1.48	4.44	13.3	40	NA	NA	NA	NA	0.997953	1.18713	1.51003	4.43632	NA	NA	NA	NA
105624-86-0	5HPP-33	Bioseek	KF3CT_MMP9	1.48	4.44	13.3	40	NA	NA	NA	NA	0.983992	1.14721	1.39592	4.21154	NA	NA	NA	NA
105624-86-0	5HPP-33	Bioseek	KF3CT_SRB	1.48	4.44	13.3	40	NA	NA	NA	NA	1.00833	1.01438	1.04515	1.38318	NA	NA	NA	NA
105624-86-0	5HPP-33	Bioseek	KF3CT_SRB	1.48	4.44	13.3	40	NA	NA	NA	NA	1.01476	1.00805	1.04555	1.68609	NA	NA	NA	NA
105624-86-0	5HPP-33	Bioseek	KF3CT_TGFb1	1.48	4.44	13.3	40	NA	NA	NA	NA	1.02619	1.04601	1.12525	2.43822	NA	NA	NA	NA
105624-86-0	5HPP-33	Bioseek	KF3CT_TGFb1	1.48	4.44	13.3	40	NA	NA	NA	NA	1.04127	1.04167	1.09493	2.22603	NA	NA	NA	NA
105624-86-0	5HPP-33	Bioseek	KF3CT_TIMP2	1.48	4.44	13.3	40	NA	NA	NA	NA	1.02027	1.00548	1.03003	2.3456	NA	NA	NA	NA
105624-86-0	5HPP-33	Bioseek	KF3CT_TIMP2	1.48	4.44	13.3	40	NA	NA	NA	NA	0.98512	0.951107	1.13549	2.66235	NA	NA	NA	NA
105624-86-0	5HPP-33	Bioseek	KF3CT_uPA	1.48	4.44	13.3	40	NA	NA	NA	NA	1.00904	1.02206	0.977943	1.8221	NA	NA	NA	NA
105624-86-0	5HPP-33	Bioseek	KF3CT_uPA	1.48	4.44	13.3	40	NA	NA	NA	NA	1.02305	1.00788	0.960468	2.48242	NA	NA	NA	NA
105624-86-0	5HPP-33	Bioseek	LPS_CD40	1.48	4.44	13.3	40	NA	NA	NA	NA	1.21595	1.60147	2.71267	3.89327	NA	NA	NA	NA
105624-86-0	5HPP-33	Bioseek	LPS_CD40	1.48	4.44	13.3	40	NA	NA	NA	NA	1.449	1.74257	2.68471	4.34028	NA	NA	NA	NA
105624-86-0	5HPP-33	Bioseek	LPS_Eselectin	1.48	4.44	13.3	40	NA	NA	NA	NA	1.05209	1.1457	1.23096	2.00355	NA	NA	NA	NA
105624-86-0	5HPP-33	Bioseek	LPS_Eselectin	1.48	4.44	13.3	40	NA	NA	NA	NA	1.07857	1.19416	1.24798	1.82631	NA	NA	NA	NA
105624-86-0	5HPP-33	Bioseek	LPS_IL1a	1.48	4.44	13.3	40	NA	NA	NA	NA	0.752728	0.833268	1.00478	1.58924	NA	NA	NA	NA
105624-86-0	5HPP-33	Bioseek	LPS_IL1a	1.48	4.44	13.3	40	NA	NA	NA	NA	0.808409	0.838001	0.924661	1.53416	NA	NA	NA	NA
105624-86-0	5HPP-33	Bioseek	LPS_IL8	1.48	4.44	13.3	40	NA	NA	NA	NA	1.06665	0.935694	0.815446	0.979797	NA	NA	NA	NA
105624-86-0	5HPP-33	Bioseek	LPS_IL8	1.48	4.44	13.3	40	NA	NA	NA	NA	1.07406	0.949246	0.794853	1.05454	NA	NA	NA	NA
105624-86-0	5HPP-33	Bioseek	LPS_MCP1	1.48	4.44	13.3	40	NA	NA	NA	NA	1.05436	1.00137	1.03316	2.55259	NA	NA	NA	NA
105624-86-0	5HPP-33	Bioseek	LPS_MCP1	1.48	4.44	13.3	40	NA	NA	NA	NA	1.01519	1.01897	1.01088	2.82611	NA	NA	NA	NA
105624-86-0	5HPP-33	Bioseek	LPS_MCSF	1.48	4.44	13.3	40	NA	NA	NA	NA	1.076	1.2409	1.68292	2.11142	NA	NA	NA	NA
105624-86-0	5HPP-33	Bioseek	LPS_MCSF	1.48	4.44	13.3	40	NA	NA	NA	NA	1.08553	1.39295	1.689	2.31138	NA	NA	NA	NA
105624-86-0	5HPP-33	Bioseek	LPS_PGE2	1.48	4.44	13.3	40	NA	NA	NA	NA	0.915571	0.822943	0.866581	0.744724	NA	NA	NA	NA
105624-86-0	5HPP-33	Bioseek	LPS_PGE2	1.48	4.44	13.3	40	NA	NA	NA	NA	1.01561	0.904044	0.81471	0.807299	NA	NA	NA	NA
105624-86-0	5HPP-33	Bioseek	LPS_SRB	1.48	4.44	13.3	40	NA	NA	NA	NA	0.943963	1.02559	1.2819	1.82026	NA	NA	NA	NA
105624-86-0	5HPP-33	Bioseek	LPS_SRB	1.48	4.44	13.3	40	NA	NA	NA	NA	0.92645	1.03777	1.27298	1.91346	NA	NA	NA	NA
105624-86-0	5HPP-33	Bioseek	LPS_TissueFactor	1.48	4.44	13.3	40	NA	NA	NA	NA	0.890669	0.954983	1.05519	1.22285	NA	NA	NA	NA
105624-86-0	5HPP-33	Bioseek	LPS_TissueFactor	1.48	4.44	13.3	40	NA	NA	NA	NA	0.920089	0.946085	1.02629	1.18868	NA	NA	NA	NA
105624-86-0	5HPP-33	Bioseek	LPS_TNFa	1.48	4.44	13.3	40	NA	NA	NA	NA	0.899847	0.898172	1.16258	1.31886	NA	NA	NA	NA
105624-86-0	5HPP-33	Bioseek	LPS_TNFa	1.48	4.44	13.3	40	NA	NA	NA	NA	1.00927	0.94849	1.34783	1.81121	NA	NA	NA	NA
105624-86-0	5HPP-33	Bioseek	LPS_VCAM1	1.48	4.44	13.3	40	NA	NA	NA	NA	1.10596	1.44971	2.02208	3.45619	NA	NA	NA	NA
105624-86-0	5HPP-33	Bioseek	LPS_VCAM1	1.48	4.44	13.3	40	NA	NA	NA	NA	1.18384	1.65356	2.24562	3.6452	NA	NA	NA	NA
105624-86-0	5HPP-33	Bioseek	SAg_CD38	1.48	4.44	13.3	40	NA	NA	NA	NA	1.03002	1.29486	2.37859	4.50365	NA	NA	NA	NA
105624-86-0	5HPP-33	Bioseek	SAg_CD38	1.48	4.44	13.3	40	NA	NA	NA	NA	0.994312	1.38184	2.14781	5.64141	NA	NA	NA	NA
105624-86-0	5HPP-33	Bioseek	SAg_CD40	1.48	4.44	13.3	40	NA	NA	NA	NA	1.16623	1.32251	1.96162	5.63848	NA	NA	NA	NA
105624-86-0	5HPP-33	Bioseek	SAg_CD40	1.48	4.44	13.3	40	NA	NA	NA	NA	1.16196	1.45301	1.92281	6.14611	NA	NA	NA	NA
105624-86-0	5HPP-33	Bioseek	SAg_CD69	1.48	4.44	13.3	40	NA	NA	NA	NA	1.18289	1.2128	1.46498	3.09637	NA	NA	NA	NA
105624-86-0	5HPP-33	Bioseek	SAg_CD69	1.48	4.44	13.3	40	NA	NA	NA	NA	1.07529	1.26221	1.57457	3.31225	NA	NA	NA	NA
105624-86-0	5HPP-33	Bioseek	SAg_Eselectin	1.48	4.44	13.3	40	NA	NA	NA	NA	1.15717	1.05168	1.07868	3.72892	NA	NA	NA	NA
105624-86-0	5HPP-33	Bioseek	SAg_Eselectin	1.48	4.44	13.3	40	NA	NA	NA	NA	1.11943	0.994274	1.20217	4.11341	NA	NA	NA	NA
105624-86-0	5HPP-33	Bioseek	SAg_IL8	1.48	4.44	13.3	40	NA	NA	NA	NA	1.09737	1.17037	0.944631	1.39657	NA	NA	NA	NA
105624-86-0	5HPP-33	Bioseek	SAg_IL8	1.48	4.44	13.3	40	NA	NA	NA	NA	1.15205	1.21109	0.98158	1.32295	NA	NA	NA	NA
105624-86-0	5HPP-33	Bioseek	SAg_MCP1	1.48	4.44	13.3	40	NA	NA	NA	NA	1.10011	0.982432	0.885632	4.12854	NA	NA	NA	NA
105624-86-0	5HPP-33	Bioseek	SAg_MCP1	1.48	4.44	13.3	40	NA	NA	NA	NA	1.06702	1.01245	0.899139	5.09056	NA	NA	NA	NA
105624-86-0	5HPP-33	Bioseek	SAg_MIG	1.48	4.44	13.3	40	NA	NA	NA	NA	1.03892	1.03421	1.04249	6.97336	NA	NA	NA	NA
105624-86-0	5HPP-33	Bioseek	SAg_MIG	1.48	4.44	13.3	40	NA	NA	NA	NA	1.06336	1.05163	1.09085	8.49226	NA	NA	NA	NA
105624-86-0	5HPP-33	Bioseek	SAg_PBMCCytotoxicity	1.48	4.44	13.3	40	NA	NA	NA	NA	1.04371	1.06801	0.898481	0.913945	NA	NA	NA	NA
105624-86-0	5HPP-33	Bioseek	SAg_PBMCCytotoxicity	1.48	4.44	13.3	40	NA	NA	NA	NA	0.951314	0.957485	0.859264	0.87466	NA	NA	NA	NA
105624-86-0	5HPP-33	Bioseek	SAg_Proliferation	1.48	4.44	13.3	40	NA	NA	NA	NA	1.32533	1.76718	1.79699	10.5719	NA	NA	NA	NA
105624-86-0	5HPP-33	Bioseek	SAg_Proliferation	1.48	4.44	13.3	40	NA	NA	NA	NA	1.11864	1.62308	1.72177	9.99734	NA	NA	NA	NA
105624-86-0	5HPP-33	Bioseek	SAg_SRB	1.48	4.44	13.3	40	NA	NA	NA	NA	0.967276	1.08451	1.29114	1.82715	NA	NA	NA	NA
105624-86-0	5HPP-33	Bioseek	SAg_SRB	1.48	4.44	13.3	40	NA	NA	NA	NA	0.960337	1.11458	1.30713	1.96396	NA	NA	NA	NA
5HPP-33	105624-86-0	Novascreen	NVS_ADME_hCYP1A1_Activator	0.00914	0.0274	0.0823	0.247	0.741	2.22	6.67	20	-8.364	-6.135	-9.933	-9.872	-11.925	-1.755	-3.114	-0.961
5HPP-33	105624-86-0	Novascreen	NVS_ADME_hCYP2C19_Activator	0.00914	0.0274	0.0823	0.247	0.741	2.22	6.67	20	-0.859	2.167	3.187	0.618	-6.168	-12.045	-24.554	-40.872
5HPP-33	105624-86-0	Novascreen	NVS_ADME_hCYP2C9_Activator	0.00914	0.0274	0.0823	0.247	0.741	2.22	6.67	20	1.487	0.641	1.772	0.163	-1.11	-3.749	-42.255	-52.69
5HPP-33	105624-86-0	Novascreen	NVS_ADME_hCYP2D6_Activator	0.00914	0.0274	0.0823	0.247	0.741	2.22	6.67	20	4.885	4.808	-1.857	0.767	-12.692	4.769	0.458	-18.457
5HPP-33	105624-86-0	Novascreen	NVS_ADME_hCYP3A4_Activator	0.00914	0.0274	0.0823	0.247	0.741	2.22	6.67	20	-0.643	-0.368	1.413	-0.913	4.951	3.795	-6.985	-42.168
5HPP-33	105624-86-0	Novascreen	NVS_ENZ_hACP1_Activator	0.0229	0.0686	0.206	0.617	1.85	5.56	16.7	50	17.444	9.943	25.702	14.588	19.474	0.137	9.393	7.81
5HPP-33	105624-86-0	Novascreen	NVS_ENZ_hAKT1_Activator	0.0229	0.0686	0.206	0.617	1.85	5.56	16.7	50	1.412	4.018	-4.453	1.846	4.127	0.434	-14.228	2.932
5HPP-33	105624-86-0	Novascreen	NVS_ENZ_hLynA_Activator	0.0229	0.0686	0.206	0.617	1.85	5.56	16.7	50	-0.076	-0.989	-2.588	-6.851	-7.003	-7.155	-4.871	-5.861
5HPP-33	105624-86-0	Novascreen	NVS_ENZ_hMsk1_Activator	0.0229	0.0686	0.206	0.617	1.85	5.56	16.7	50	9.574	8.292	4.855	3.829	6.496	3.983	5.009	3.111
5HPP-33	105624-86-0	Novascreen	NVS_ENZ_hPTPN1_Activator	0.0229	0.0686	0.206	0.617	1.85	5.56	16.7	50	-2.002	0.543	-1.087	-10.396	0.106	0.623	-12.146	-6.06
5HPP-33	105624-86-0	Novascreen	NVS_ENZ_hPTPN12_Activator	0.0229	0.0686	0.206	0.617	1.85	5.56	16.7	50	-18.973	-1.637	-11.75	-3.329	-7.663	-23.885	-6.507	-15.795
5HPP-33	105624-86-0	Novascreen	NVS_ENZ_hPTPN14_Activator	0.0229	0.0686	0.206	0.617	1.85	5.56	16.7	50	-11.812	-12.196	-8.465	-9.562	-6.491	-4.379	-9.617	-9.371
5HPP-33	105624-86-0	Novascreen	NVS_ENZ_hPTPN6_Activator	0.0229	0.0686	0.206	0.617	1.85	5.56	16.7	50	-7.853	3.639	-0.076	7.623	2.183	13.255	17.047	6.512
5HPP-33	105624-86-0	Novascreen	NVS_ENZ_hPTPRB_Activator	0.0229	0.0686	0.206	0.617	1.85	5.56	16.7	50	-6.955	-5.838	1.837	-0.569	-10.828	-3.884	-0.849	-17.143
5HPP-33	105624-86-0	Novascreen	NVS_ENZ_hPTPRM_Activator	0.0229	0.0686	0.206	0.617	1.85	5.56	16.7	50	-3.834	1.547	-5.353	-2.889	-4.285	1.177	3.395	9.639
5HPP-33	105624-86-0	Novascreen	NVS_ENZ_hTie2_Activator	0.0229	0.0686	0.206	0.617	1.85	5.56	16.7	50	-0.678	1.076	1.462	1.532	1.286	-1.099	-2.889	-0.362
5HPP-33	105624-86-0	Novascreen	NVS_ENZ_hVEGFR2_Activator	0.0229	0.0686	0.206	0.617	1.85	5.56	16.7	50	0.133	-0.267	-2.375	-4.283	5.905	8.817	8.515	6.859
