# Supplementary material for: A Computational Model Predicting Disruption of Blood Vessel Development
Source: PLoS Comput Biol. 2013 Apr 4;9(4):e1002996. doi: 10.1371/journal.pcbi.1002996 (PMC3616981; doi:10.1371/journal.pcbi.1002996)
Supplement: Table S3 — Comparison of selected AngioTool metrics between the simulation outputs (control model, 5HPP-33 low concentration, and 5HPP-33 high concentration) and representative experimental images. Significance was calculated based on student's t-test p-values. (XLSX) [file pcbi.1002996.s008.xlsx]

## Sheet: AngioTool Comparison
	N=30		N=30		N=30		N=1	N=1	N=1
Metric	Control Avg	Std Dev	5HPP33_LD Avg	Std Dev	5HPP33_HD Avg	Std Dev	Exp_ctrl	Exp_LC	Exp_HC
Explant area	1.3894	0.0507318	1.2836	0.0592263	1.60648	0.109839	3.87863	5.48317	5.45683
Vessels area	0.799234	0.0317051	0.799746	0.0350322	0.459842	0.0270349	1.26166	1.64837	1.10732
Vessels percentage area	57.5446	1.81629	62.325	1.35451	28.7173	2.14506	32.5284	30.0623	20.2923
Total Number of Junctions	51.3667	8.20632	64.3871	6.46363	65.7941	11.0749	128	163	45
Junctions density	36.9916	5.82906	50.209	4.95879	41.1406	7.58206	33.0014	29.7273	8.24655
Total Vessels Length	12.7696	0.793374	13.3814	0.671448	14.309	0.850434	33.0197	41.2963	25.5786
Average Vessels Length	6.19615	3.66083	8.36991	4.00296	0.252587	0.0523657	0.246416	0.305898	0.0817209
Total Number of End Points	21.6667	5.261	13.9677	2.85755	160.029	16.6269	352	386	650
Average Lacunarity	0.0878282	0.0094763	0.0657484	0.00737759	0.250572	0.0404589	0.157094	0.171633	0.269269
Students ttest (pvalue)
	Control/5HPP33_LC	5HPP33_LC/5HPP33_HC	Control/5HPP33_HC
Explant area	7.88883e-06	6.00706e-08	1.45628e-05
Vessels area	0.111593	3.56107e-09	4.63747e-09
Vessels percentage area	4.10101e-06	2.28546e-09	2.98534e-09
Total Number of Junctions	0.000484083	0.149389	6.77723e-05
Junctions density	8.16318e-06	0.00729659	0.0347916
Total Vessels Length	0.62328	0.000347072	2.68843e-05
Average Vessels Length	0.372187	1.53614e-06	1.25219e-06
Total Number of End Points	0.000408859	1.89553e-09	2.49205e-09
Average Lacunarity	1.22735e-05	1.49124e-09	5.84023e-09
